# Supplementary material
Source: publisher figshare collection journal article supplement (https://karger.figshare.com/ndownloader/files/17991449)
Supplement: Supplementary file 1 [file 17991449]

Supplementary Table 2. Results from logistic path model 1: logistic regression coefficients,

standard errors, z-test statistics, odds ratios with 95% CI.

| Intercepts / Path | Estimate (SE) | Z  statistic | Odds Ratio | 95% CI for  Odds Ratio |
| --- | --- | --- | --- | --- |
| Intercept (BCS) | -1.23*** (0.15) | -8.12 |  |  |
| Intercept (MDR) | -3.47*** (0.26) | -13.38 |  |  |
| SES -> UICC | 0.29*** (0.06) | 4.55 | 1.33 | [1.18 ; 1.51] |
| Disability -> UICC | -0.05 (0.08) | -0.69 | 0.95 | [0.81 ; 1.11] |
| UICC -> BCS | 0.90*** (0.05) | 16.97 | 2.45 | [2.21 ; 2.72] |
| SES -> BCS | 0.71*** (0.09) | 7.70 | 2.04 | [1.70 ; 2.45] |
| Disability -> BCS | 0.24* (0.11) | 2.21 | 1.27 | [1.03 ; 1.57] |
| UICC -> MDR | 0.60*** (0.09) | 6.94 | 1.82 | [1.54 ; 2.16] |
| SES -> MDR | 2.16*** (0.19) | 11.40 | 8.66 | [5.98 ; 12.56] |
| Disability -> MDR | 0.35 (0.21) | 1.69 | 1.41 | [0.95 ; 2.12] |
| Disability -> SES | 0.94*** (0.08) | 11.36 | 2.57 | [2.18 ; 3.02] |

Note: N=3,922; * p < .05, *** p < .001; BCS= breast-conserving surgery; MDR = mastectomy with direct reconstruction (mastectomy without direct reconstruction=reference category); SES = socio-economic status class 2 (class 1 = reference category); disability = no (yes = reference category)
